# Supplementary material for: Telomere length and survival in primary cutaneous melanoma patients
Source: PubMed Central journal article supplement (PMC6053393; doi:10.1038/s41598-018-29322-9), 2018-07-19
Supplement: 41598_2018_29322_MOESM1_ESM.pdf [file 41598_2018_29322_MOESM1_ESM.pdf]

## Supplementary Information

### Telomere length and survival in primary cutaneous melanoma patients

Sivaramakrishna Rachakonda<sup>1</sup>, Nalini Srinivas<sup>1</sup>, Seyed Hamidreza Mahmoudpour<sup>1,2</sup>, Zaida Garcia-Casado<sup>3</sup>, Celia Requena<sup>4</sup>, Victor Traves<sup>5</sup>, Virtudes Soriano<sup>6</sup>, Maurizio Cardelli<sup>7</sup>, Dace Pjanova<sup>8</sup>, Anders Molven<sup>9,10</sup>, Nelleke Gruis<sup>11</sup>, Eduardo Nagore<sup>4\*</sup>, Rajiv Kumar<sup>1,12\*</sup>

<sup>1</sup>Division of Molecular Genetic Epidemiology, <sup>12</sup>German Consortium for Translational Research, German Cancer Research Center, Heidelberg, Germany

<sup>2</sup>Institute of Medical Biostatistics, University Medical Center of Johannes Gutenberg, University of Mainz, Mainz, Germany

<sup>3</sup>Laboratory of Molecular Biology, <sup>4</sup>Department of Dermatology, <sup>5</sup>Department of Pathology, <sup>6</sup>Department of Medical Oncology, Instituto Valenciano de Oncologia, Valencia, Spain

<sup>7</sup>Advanced Technology Center for Aging Research, Italian National Research Center on Aging (INRCA), Ancona, Italy

<sup>8</sup>Latvian Biomedical Research and Study Centre, Riga, Latvia

<sup>9</sup>Department of Clinical Medicine, Gade Laboratory of Pathology, <sup>10</sup>Department of Pathology, Haukeland University Hospital, Bergen, Norway

<sup>11</sup>Department of Dermatology, Leiden University Medical Center, Leiden, The Netherlands

\*Equal contribution

**\*Correspondence to:** Rajiv Kumar, Division of Molecular Genetic Epidemiology, German Cancer Research Center, Im Neuenheimer Feld 580, 69120 Heidelberg, Germany

Email: [r.kumar@dkfz.de](mailto:r.kumar@dkfz.de)

## Results

### Telomere length-associated single nucleotide polymorphisms

The patients included in the study were further genotyped for rs1317082, rs7726159 and rs6060627 polymorphisms that have been shown to associate with telomere length in genome wide association studies<sup>1</sup>. The genotype data were analyzed using additive, dominant and recessive models. The genotypes *per se* did not associate with patient survival (**Supplementary Table S2**). For the rs1317082 A>G polymorphism within the *TERC* locus, the variant G allele associated with a decrease in telomere length by 77 nucleotides<sup>1</sup>. The variant A-allele for the rs7726159 C>A polymorphism within the *TERT* locus has been reported to be associated with an increase in telomere length by 73 nucleotides<sup>1</sup>. Similarly, for the rs6060627 C>T polymorphism at the *BCL2L1* locus, the variant T allele has been shown to be associated with an increase in telomere-length by 36 nucleotides<sup>1</sup>.

| <b>Supplementary Table S1. Clinical-pathological parameters of cutaneous melanoma patients</b> |                           |                         |                                  |                         |                   |                   |
|------------------------------------------------------------------------------------------------|---------------------------|-------------------------|----------------------------------|-------------------------|-------------------|-------------------|
|                                                                                                |                           | <b>Total<br/>Number</b> | <b>Disease-specific survival</b> |                         |                   |                   |
|                                                                                                |                           |                         | <b>Dead (%)</b>                  | <b>HR (95% CI)</b>      | <b>P</b>          | <b>Log rank P</b> |
| All categories                                                                                 |                           | 1019                    | 97 (9.5)                         |                         |                   |                   |
| Telomere length                                                                                | Long (T/S ratio>1.20)     | 478                     | 30 (6.2)                         | ref                     |                   | 0.001             |
|                                                                                                | Short (T/S ratio≤1.20)    | 517                     | 63 (12.2)                        | <b>2.05 (1.33-3.16)</b> | 0.001             |                   |
|                                                                                                | Data missing              | 24                      | 4                                |                         |                   |                   |
| Age                                                                                            | (Continuous)              | 1019                    | 97                               | <b>1.04 (1.03-1.06)</b> | <b>&lt;0.0001</b> | -                 |
| Sex                                                                                            | Male                      | 463                     | 57 (12.3)                        | ref                     | 0.0008            | 0.0006            |
|                                                                                                | Female                    | 556                     | 40 (7.2)                         | <b>0.50 (0.33-0.75)</b> |                   |                   |
| Nevus count                                                                                    | <50                       | 832                     | 79 (9.5)                         | ref                     | 0.03              | 0.03              |
|                                                                                                | >50                       | 144                     | 7 (4.9)                          | <b>0.43 (0.20-0.94)</b> |                   |                   |
|                                                                                                | Data missing              | 43                      | 11 (25.6)                        |                         |                   |                   |
| Tumor location                                                                                 | Axial (Head&neck /Trunk)  | 564                     | 65 (11.5)                        | ref                     |                   | 0.0005            |
|                                                                                                | Extremities (Lower/Upper) | 385                     | 21                               | <b>0.44 (0.27-0.71)</b> | 0.001             |                   |
|                                                                                                | Acral /Mucosal            | 70                      | 11                               | 1.46 (0.77-2.78)        | 0.24              |                   |
| Tumor stage                                                                                    | 1 ( 1A, 1B)               | 737                     | 34 (4.6)                         | ref                     | <0.0001           | <0.0001           |
|                                                                                                | 2 (2A, 2B, 2C)            | 282                     | 63 (22.3)                        | <b>5.39 (3.54-8.22)</b> |                   |                   |
| Breslow thickness                                                                              | ≤2mm                      | 792                     | 46                               | ref                     | <0.0001           | <0.0001           |
|                                                                                                | >2mm                      | 221                     | 51                               | <b>4.75 (3.18-7.09)</b> |                   |                   |
|                                                                                                | missing                   | 6                       |                                  |                         |                   |                   |
| Tumor ulceration                                                                               | No                        | 830                     | 52 (6.3)                         | ref                     | <0.0001           | <0.0001           |
|                                                                                                | Yes                       | 163                     | 41 (25.2)                        | <b>4.95 (3.28-7.48)</b> |                   |                   |
|                                                                                                | Data missing              | 26                      | 4 (15.4)                         |                         |                   |                   |
| Tumor mitotic rate                                                                             |                           | 707                     | 60 (8.5)                         | <b>1.14 (1.09-1.19)</b> | <0.0001           |                   |
|                                                                                                | Data missing              | 312                     | 37 (11.9)                        |                         |                   |                   |
| Histology                                                                                      | LMM                       | 57                      | 4 (7.0)                          | 1.18 (0.43-3.29)        | 0.75              | <0.0001           |
|                                                                                                | SSM                       | 707                     | 47 (6.6)                         | ref                     |                   |                   |
|                                                                                                | NM                        | 152                     | 30 (19.7)                        | <b>3.16 (1.99-5.00)</b> | <0.0001           |                   |
|                                                                                                | ALM                       | 35                      | 5 (14.3)                         | 2.41 (0.96-6.06)        | 0.06              |                   |
|                                                                                                | others                    | 68                      | 11 (16.2)                        | <b>2.79 (1.45-5.39)</b> | 0.002             |                   |

|                          |               |     |           |                  |      |      |
|--------------------------|---------------|-----|-----------|------------------|------|------|
| Lentigines               | No            | 120 | 10 (8.3)  | ref              |      | 0.63 |
|                          | Yes           | 852 | 78 (9.2)  | 1.18 (0.61-2.27) | 0.63 |      |
|                          | Data missing  | 47  | 9 (19.1)  |                  |      |      |
| Non-melanoma skin cancer | No            | 832 | 80 (9.6)  | ref              |      |      |
|                          | Yes           | 165 | 12 (7.3)  | 0.73 (0.40-1.35) | 0.32 | 0.32 |
|                          | Data missing  | 22  | 5 (22.7)  |                  |      |      |
| Tumor regression         | No            | 777 | 74 (9.5)  | ref              |      | 0.90 |
|                          | 50% of tumor  | 69  | 4 (5.8)   | 0.79 (0.29-2.16) | 0.64 |      |
|                          | >50% of tumor | 14  | 1 (7.1)   | 1.04 (0.14-7.48) | 0.97 |      |
|                          | Data missing  | 159 | 18 (11.3) |                  |      |      |
| Smoking                  | No            | 533 | 46 (8.6)  | ref              |      | 0.84 |
|                          | Yes           | 418 | 35 (8.4)  | 1.05 (0.67-1.63) | 0.84 |      |
|                          | Data missing  | 68  | 16 (23.5) |                  |      |      |

| <b>Supplementary Table S2.</b> Effect of telomere-length associated polymorphisms on melanoma-specific survival |                  |               |             |                    |                |                                    |
|-----------------------------------------------------------------------------------------------------------------|------------------|---------------|-------------|--------------------|----------------|------------------------------------|
| <b>Effect</b>                                                                                                   | <b>Genotype</b>  | <b>Number</b> | <b>Dead</b> | <b>HR (95% CI)</b> | <b>P-value</b> | <b>Weighted genetic risk score</b> |
| rs1317082                                                                                                       | AA               | 650           | 56          | ref                |                | 0                                  |
|                                                                                                                 | AG               | 293           | 36          | 1.49 (0.98-2.27)   | 0.06           | 0.39                               |
|                                                                                                                 | GG               | 45            | 3           | 0.71 (0.22-2.26)   | 0.56           | -0.34                              |
|                                                                                                                 | <i>Dominant</i>  |               |             |                    |                |                                    |
|                                                                                                                 | AA               | 650           | 56          | ref                |                |                                    |
|                                                                                                                 | AG+GG            | 338           | 39          | 1.37 (0.91-2.07)   | 0.13           |                                    |
|                                                                                                                 | <i>Recessive</i> |               |             |                    |                |                                    |
|                                                                                                                 | GG               | 45            | 3           | ref                |                |                                    |
|                                                                                                                 | AA+AG            | 943           | 92          | 1.63 (0.52-5.14)   | 0.41           |                                    |
| rs7726159                                                                                                       | CC               | 369           | 39          | ref                |                | 0                                  |
|                                                                                                                 | CA               | 426           | 41          | 0.89 (0.57-1.38)   | 0.60           | -0.12                              |
|                                                                                                                 | AA               | 163           | 10          | 0.54 (0.27-1.09)   | 0.08           | -0.61                              |
|                                                                                                                 | <i>Dominant</i>  |               |             |                    |                |                                    |
|                                                                                                                 | CC               | 369           | 39          | ref                |                |                                    |
|                                                                                                                 | CA+AA            | 589           | 51          | 0.79 (0.52-1.20)   | 0.27           |                                    |
|                                                                                                                 | <i>Recessive</i> |               |             |                    |                |                                    |
|                                                                                                                 | AA               | 163           | 10          | ref                |                |                                    |
|                                                                                                                 | CC+CA            | 795           | 80          | 1.74 (0.90-3.35)   | 0.10           |                                    |
| rs6060627                                                                                                       | CC               | 397           | 36          | ref                |                | 0                                  |
|                                                                                                                 | CT               | 434           | 48          | 1.22 (0.79-1.88)   | 0.37           | 0.20                               |
|                                                                                                                 | TT               | 125           | 7           | 0.63 (0.28-1.42)   | 0.27           | -0.46                              |
|                                                                                                                 | <i>Dominant</i>  |               |             |                    |                |                                    |
|                                                                                                                 | CC               | 397           | 36          | ref                |                |                                    |
|                                                                                                                 | CT+TT            | 559           | 55          | 1.09 (0.72-1.66)   | 0.69           |                                    |
|                                                                                                                 | <i>Recessive</i> |               |             |                    |                |                                    |
|                                                                                                                 | TT               | 125           | 7           | ref                |                |                                    |
|                                                                                                                 | CC+CT            | 831           | 84          | 1.76 (0.82-3.81)   | 0.15           |                                    |

- 1 Pooley, K. A. *et al.* A genome-wide association scan (GWAS) for mean telomere length within the COGS project: identified loci show little association with hormone-related cancer risk. *Human molecular genetics* **22**, 5056-5064, doi:10.1093/hmg/ddt355 (2013).

### **Legends to Supplementary Figures**

**Supplementary Figure S1:** Flow chart showing the selection of patients for investigation of the effect of telomere length on melanoma-specific survival. Only incident patients with stage I and II melanoma were included in the study.

**Supplementary Figure S2:** Descriptive statistics of age-matched groups of melanoma patients with long and short telomeres. The exact matching of the patients was carried using Proc SQL in SAS and the patients with long telomeres were considered as controls and the patients with short telomeres as cases.
